# Supplementary material for: Plant Vascular Architecture Determines the Pattern of Herbivore-Induced Systemic Responses in Arabidopsis thaliana
Source: PubMed Central journal article supplement (PMC4399992; doi:10.1371/journal.pone.0123899), 2015-04-16
Supplement: pone.0123899.s001.pdf [file pone.0123899.s001.pdf]

**Figure A. Reddening in the petiole of a young leaf 48h following insect damage to the older leaf below it. White arrows point to petioles of young leaves where color differences were evident.**

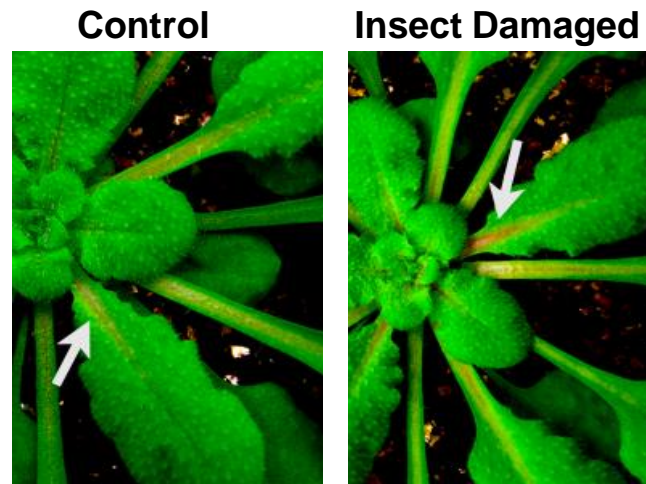

**Table A. Source leaf removal increases total phenolics in *A. thaliana* plants.** Summary of 3-way ANOVA comparing total phenolics within two herbivore-damaged leaves and young, systemic leaves of intact *A. thaliana* rosettes or those with source leaves removed.

| GLM results            |           | Total Phenolics |          |
|------------------------|-----------|-----------------|----------|
| Source of Variation    | <i>df</i> | <i>F</i>        | <i>P</i> |
| A, Herbivory           | 2         | 5.67            | 0.0042   |
| B, Leaf type           | 1         | 2.62            | 0.1078   |
| C, Source leaf removal | 1         | 4.41            | 0.0373   |
| A x B                  | 2         | 0.20            | 0.8154   |
| A x C                  | 2         | 14.87           | <0.0001  |
| B x C                  | 1         | 18.71           | <0.0001  |
| A x B x C              | 2         | 2.47            | 0.088    |

**Table B. Source leaf removal reduces anthocyanin accumulation in *A. thaliana* plants.** Summary of 3-way ANOVA comparing anthocyanin accumulation within two herbivore-damaged leaves and young, systemic leaves of intact *A. thaliana* rosettes or those with source leaves removed.

| GLM results            |           | Anthocyanins |          |
|------------------------|-----------|--------------|----------|
| Source of Variation    | <i>df</i> | <i>F</i>     | <i>P</i> |
| A, Herbivory           | 2         | 0.22         | 0.7990   |
| B, Leaf type           | 1         | 38.11        | <0.0001  |
| C, Source leaf removal | 1         | 14.95        | 0.0002   |
| A x B                  | 2         | 0.06         | 0.9437   |
| A x C                  | 2         | 1.00         | 0.3715   |
| B x C                  | 1         | 11.50        | 0.0009   |
| A x B x C              | 2         | 2.10         | 0.1261   |

**Table C. Source leaf removal does not influence flavonoid accumulation in *A. thaliana* plants.** Summary of 3-way ANOVA comparing flavonoid accumulation within two herbivore-damaged leaves and young, systemic leaves of intact *A. thaliana* rosettes or those with source leaves removed.

| GLM results            |           | Flavonoids |          |
|------------------------|-----------|------------|----------|
| Source of Variation    | <i>df</i> | <i>F</i>   | <i>P</i> |
| A, Herbivory           | 2         | 33.79      | <0.0001  |
| B, Leaf type           | 1         | 45.57      | <0.0001  |
| C, Source leaf removal | 1         | 2.16       | 0.1436   |
| A x B                  | 2         | 5.76       | 0.0038   |
| A x C                  | 2         | 5.87       | 0.0035   |
| B x C                  | 1         | 23.54      | <0.0001  |
| A x B x C              | 2         | 1.91       | 0.1522   |

**Table D. Middle-aged leaves of *suc2-1* plants contain lower levels of total phenolic compounds relative to WT plants.**

Summary of 3-way ANOVA comparing total phenolics within two herbivore-damaged leaves and young, systemic leaves of wild-type (Ws-2) and mutant (*suc2-1*) lines.

| GLM results         |           | Total Phenolics |          |
|---------------------|-----------|-----------------|----------|
| Source of Variation | <i>df</i> | <i>F</i>        | <i>P</i> |
| A, Herbivory        | 2         | 0.90            | 0.4086   |
| B, Genotype         | 1         | 7.31            | 0.0083   |
| C, Leaf type        | 1         | 0.34            | 0.5598   |
| A x B               | 2         | 1.37            | 0.2606   |
| A x C               | 2         | 0.08            | 0.9206   |
| B x C               | 1         | 1.34            | 0.2506   |
| A x B x C           | 2         | 0.79            | 0.4569   |

**Table E. Middle-aged leaves of *suc2-1* plants contain lower levels of anthocyanin relative to WT plants.** Summary of 3-way ANOVA comparing anthocyanin accumulation within two herbivore-damaged leaves and young, systemic leaves of wild-type (Ws-2) and mutant (*suc2-1*) lines.

| GLM results         |           | Anthocyanins |          |
|---------------------|-----------|--------------|----------|
| Source of Variation | <i>df</i> | <i>F</i>     | <i>P</i> |
| A, Herbivory        | 2         | 2.49         | 0.0891   |
| B, Genotype         | 1         | 0.99         | 0.3221   |
| C, Leaf type        | 1         | 1.97         | 0.1641   |
| A x B               | 2         | 1.43         | 0.2459   |
| A x C               | 2         | 0.23         | 0.7957   |
| B x C               | 1         | 0.98         | 0.3247   |
| A x B x C           | 2         | 0.66         | 0.5203   |

**Table F. Middle-aged leaves of *suc2-1* plants contain lower levels of flavonoids relative to WT plants.** Summary of 3-way ANOVA comparing flavonoid accumulation within two herbivore-damaged leaves and young, systemic leaves of wild-type (Ws-2) and mutant (*suc2-1*) lines.

| GLM results         |           | Flavonoids |          |
|---------------------|-----------|------------|----------|
| Source of Variation | <i>df</i> | <i>F</i>   | <i>P</i> |
| A, Herbivory        | 2         | 3.70       | 0.0287   |
| B, Genotype         | 1         | 12.59      | 0.0006   |
| C, Leaf type        | 1         | 0.02       | 0.8770   |
| A x B               | 2         | 17.42      | <0.0001  |
| A x C               | 2         | 1.86       | 0.1620   |
| B x C               | 1         | 1.09       | 0.2999   |
| A x B x C           | 2         | 0.24       | 0.7846   |
